# Supplementary material for: MXene nanoribbons
Source: Royal Society of Chemistry journal article supplement (doi:10.1039/c4tc01721h), 2014-11-20
Supplement: c4tc01721h1.pdf [file c4tc01721h1.pdf]

## MXene Nanoribbons

Shijun Zhao,<sup>1,2</sup> Wei Kang,<sup>1,2</sup> and Jianming Xue<sup>1,3</sup>

<sup>1</sup>*HEDPS, Center for Applied Physics and Technology,*

*Peking University, Beijing 100871, P. R. China*

<sup>2</sup>*College of Engineering, Peking University, Beijing 100871, P. R. China*

<sup>3</sup>*State Key Laboratory of Nuclear Physics and Technology,*

*School of Physics, Peking University, Beijing 100871, P. R. China*

Here are the supplementary tables and figures:

TABLE S1. Calculated  $E_b$  (in eV),  $E_f$  (in eV),  $\gamma$  (in eV/Å),  $\Delta E$  (in eV) and  $M$  (in  $\mu_B$ ) of F-functionalized  $\text{Ti}_2\text{C}$  nanoribbons.

|          |                        | F-    |       |          |            |       |
|----------|------------------------|-------|-------|----------|------------|-------|
|          |                        | $E_b$ | $E_f$ | $\gamma$ | $\Delta E$ | $M$   |
|          | 6-CTiTi-TiTiC          | 6.32  | 1.87  | 0.54     | -0.01      | 0.01  |
|          | 7-CTiTi-TiCTi          | 6.22  | 1.84  | 0.72     | -0.17      | -0.01 |
| zigzag   | 8-CTiTi-CTiTi          | 6.23  | 1.94  | 0.54     | -0.01      | -0.01 |
|          | 7-TiTiC-TiCTi          | 6.11  | 1.92  | 0.10     | -0.19      | 1.43  |
|          | 8-TiTiC-CTiTi          | 6.14  | 2.02  | -0.44    | -0.01      | -0.11 |
|          | 6-TiCTi-TiCTi          | 6.09  | 1.80  | 0.93     | -0.31      | 1.72  |
| armchair | 6-ATi <sub>2</sub> CNR | 6.25  | 1.96  | 1.07     | 0.00       | 0.00  |
|          | 7-ATi <sub>2</sub> CNR | 6.18  | 1.89  | 1.39     | -0.12      | 1.16  |

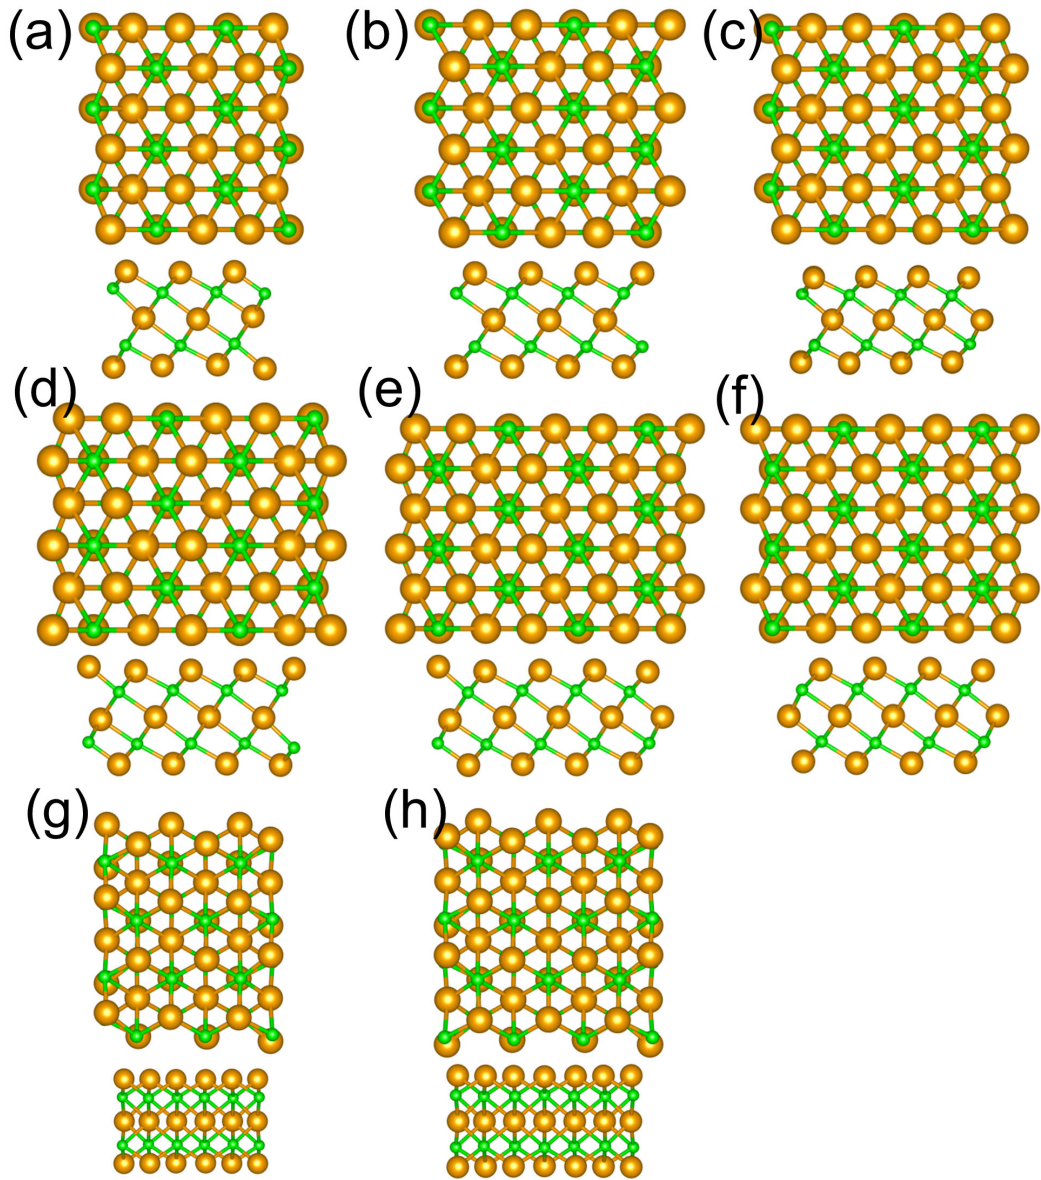

FIG. S1. Top view and side view of atomic configurations of  $\text{Ti}_3\text{C}_2$  nanoribbons studied in this work.

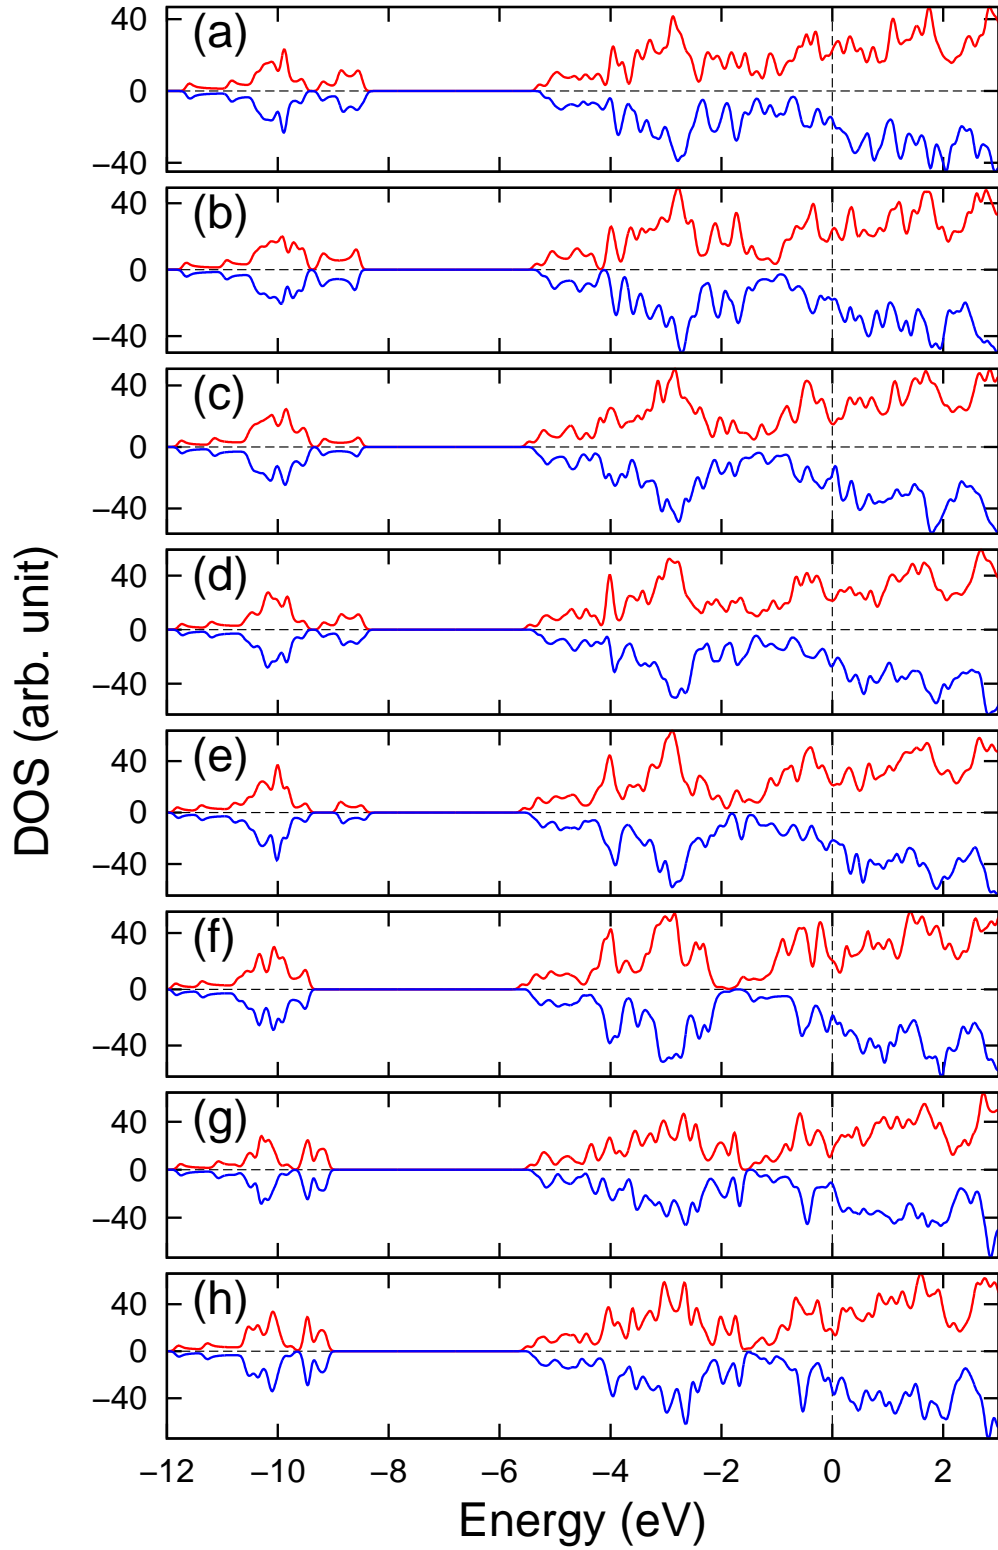

FIG. S2. Total density of states (DOS) of  $\text{Ti}_3\text{C}_2$  nanoribbons. The sequence is the same as the structures shown in Fig. S1.

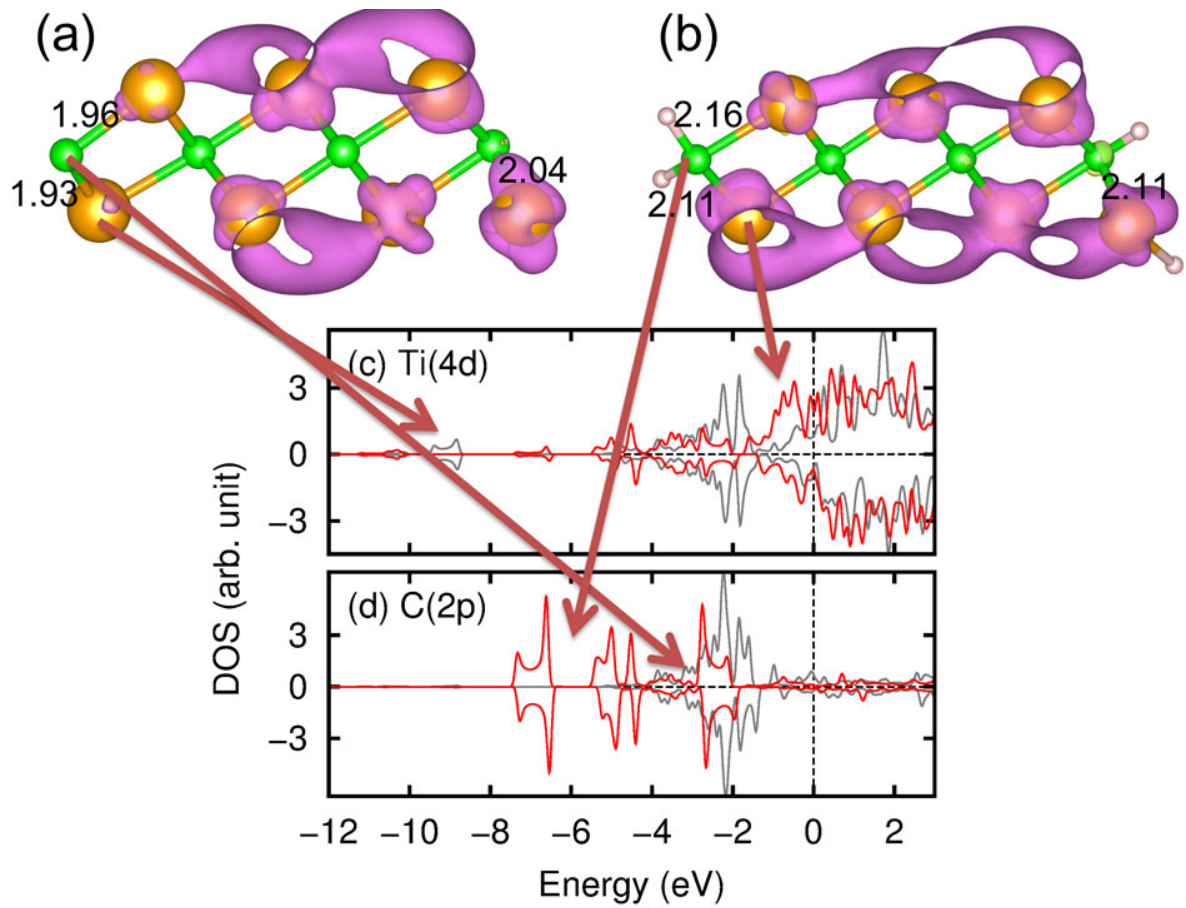

FIG. S3. Spin density plots of bare and hydrogen-passivated 7-CTiTi-TiCTi nanoribbons. The isovalue is  $\pm 0.005 \text{ e}^-/\text{au}^3$  with positive represented by purple and negative by gold color. Some bonding distances are denoted in angstrom. The projected density of states (PDOS) of two edge atoms are provided below and the gray and red curves represent the PDOS of edge atoms in bare and hydrogen-passivated nanoribbons, respectively.

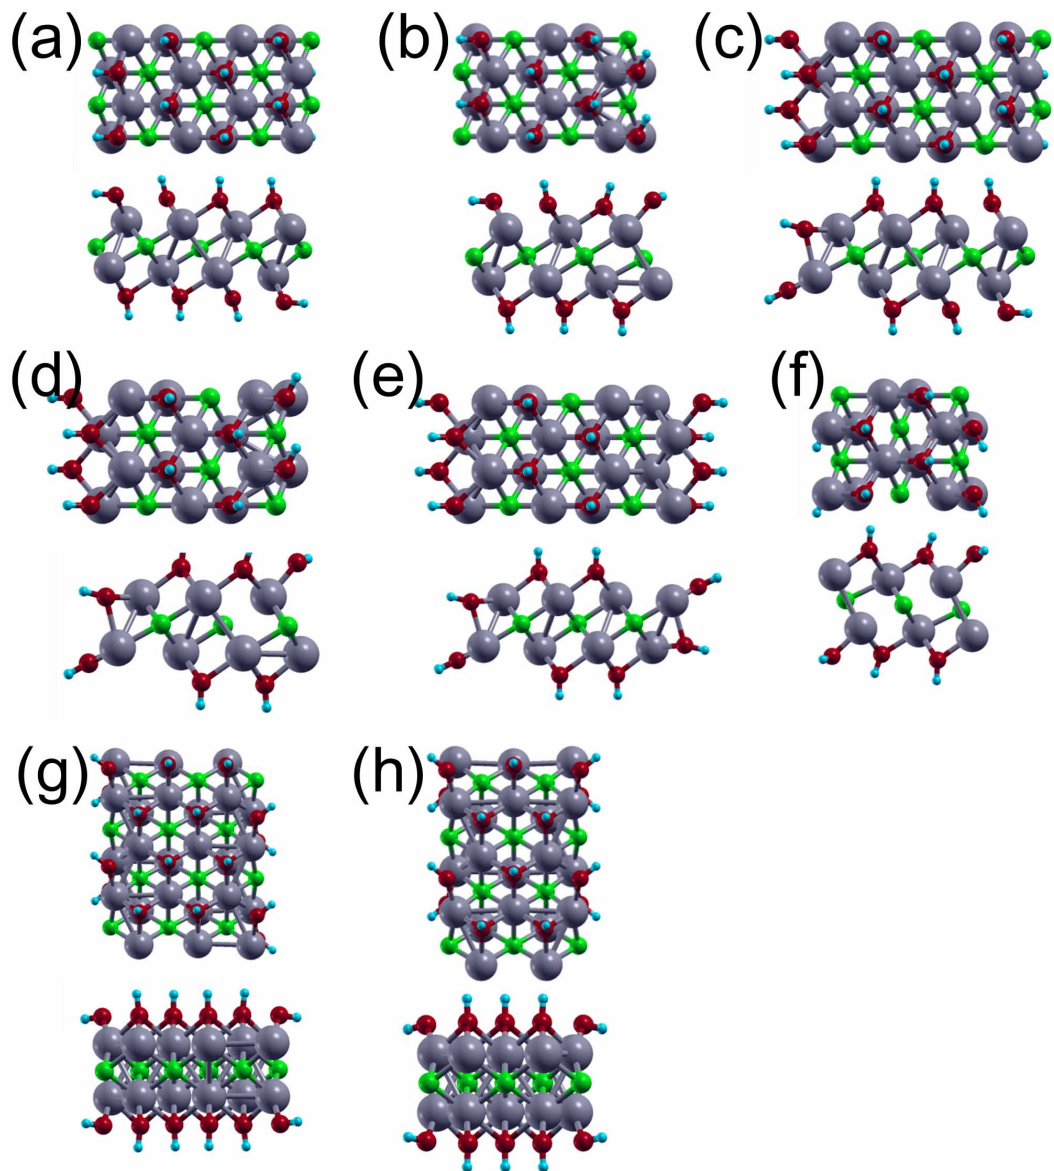

FIG. S4. Atomic configurations of  $\text{Ti}_2\text{C}(\text{OH})_2$  nanoribbons considered in this work.

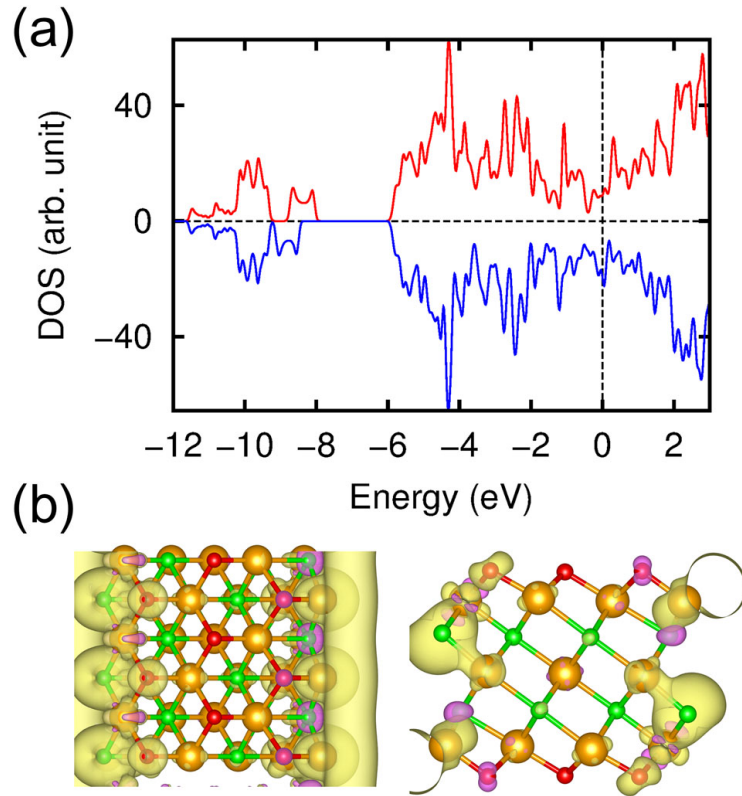

FIG. S5. (a) Total density of states of  $\text{Ti}_3\text{C}_2\text{O}_2$  nanoribbons with the CTiTi-TiCTi type. The spin density isosurface plot is given in (b) with the isovalue of  $\pm 0.005 \text{ e}^-/\text{au}^3$  with positive represented by purple and negative by gold color.

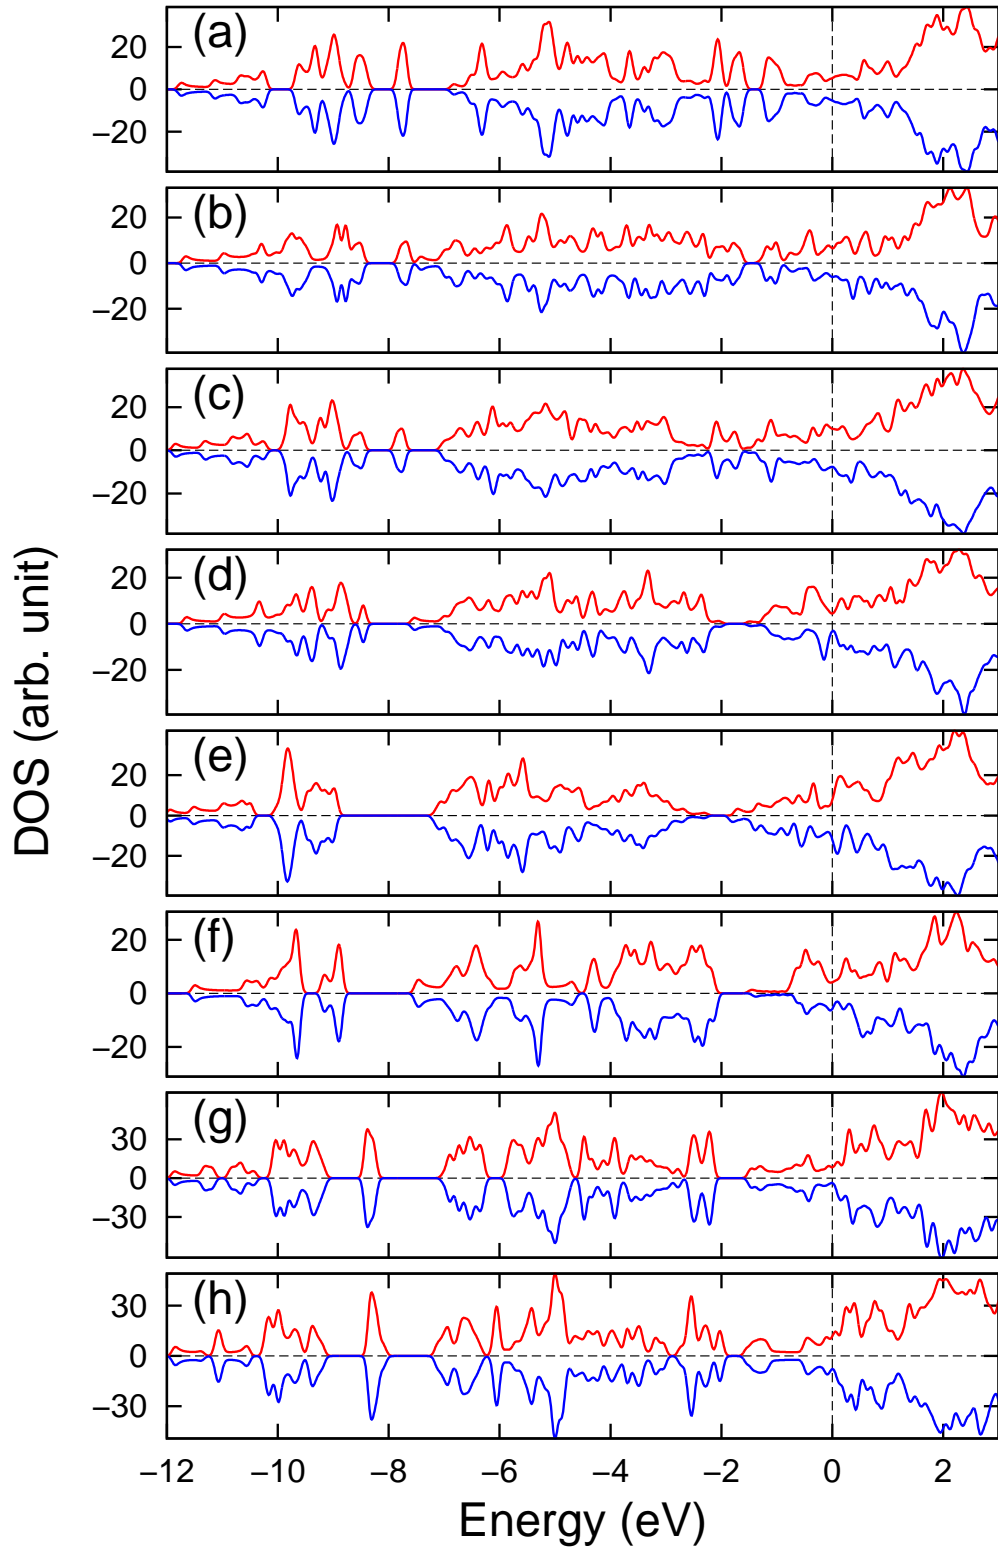

FIG. S6. Total density of states (DOS) of  $\text{Ti}_3\text{C}_2(\text{OH})_2$  nanoribbons. The sequence is the same as the structures shown in Fig. S4.

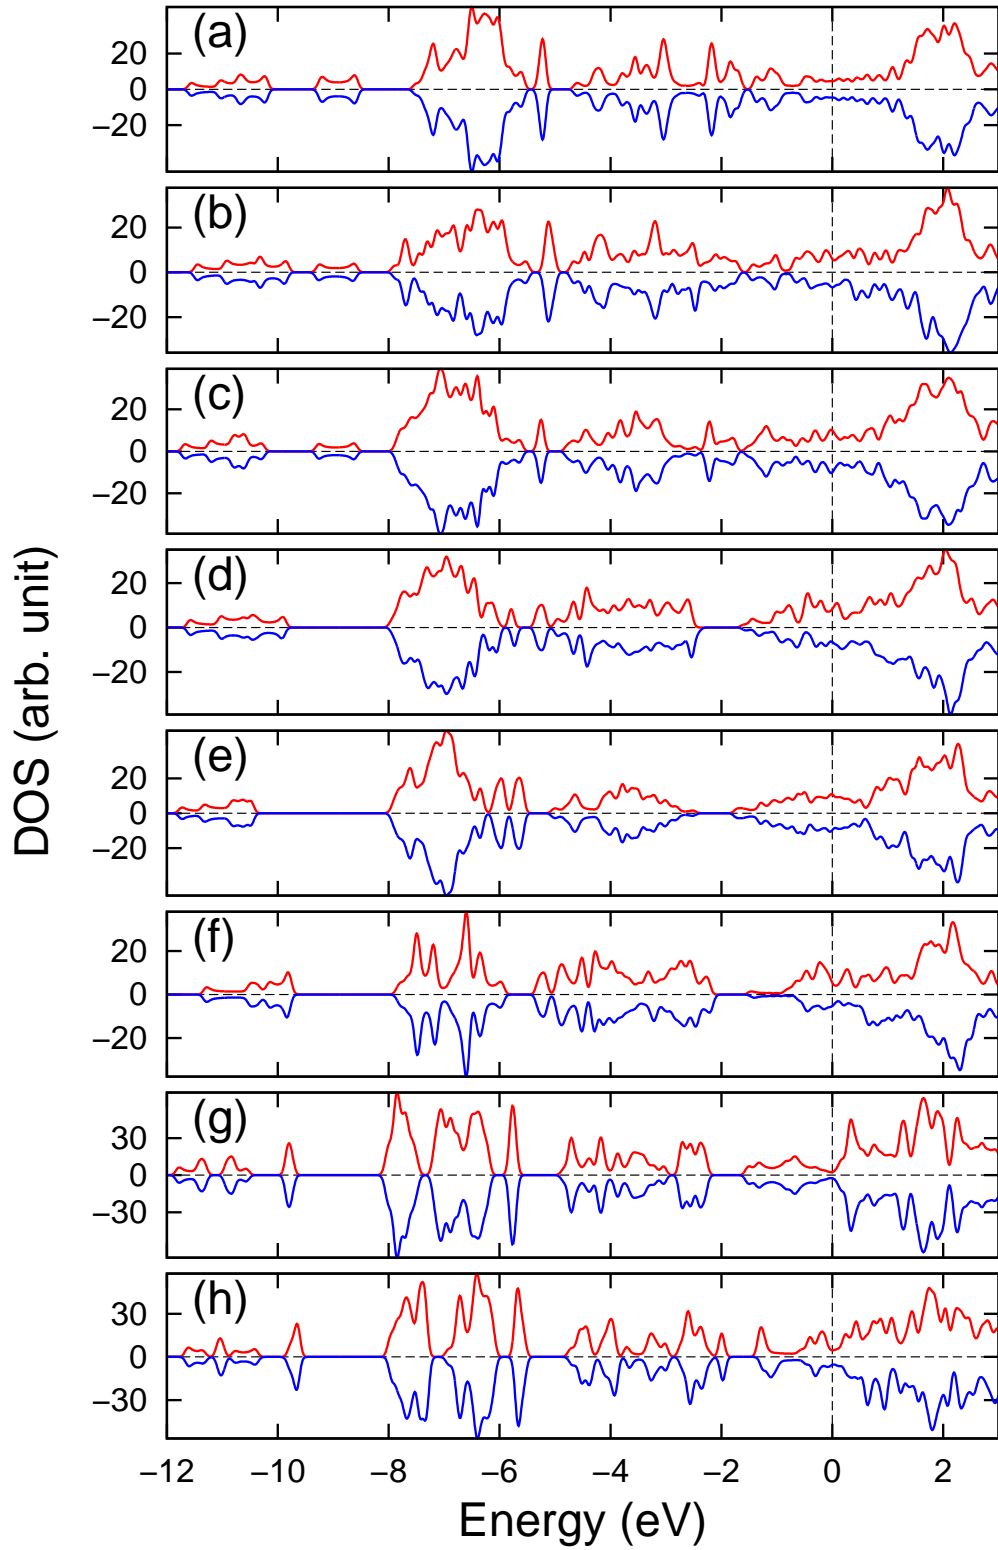

FIG. S7. Total density of states (DOS) of  $\text{Ti}_3\text{C}_2\text{F}_2$  nanoribbons.



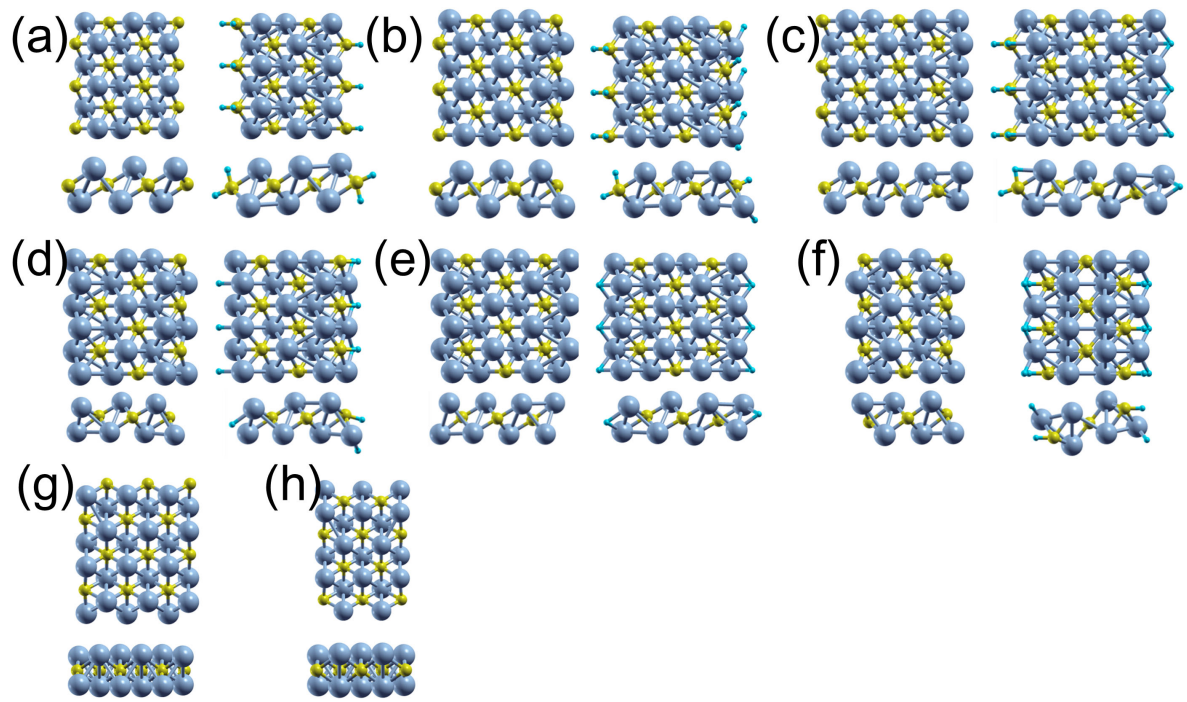

FIG. S8. Atomic configurations of pristine  $V_2C$  and corresponding H-passivated  $V_2C$  nanoribbons considered in this work.

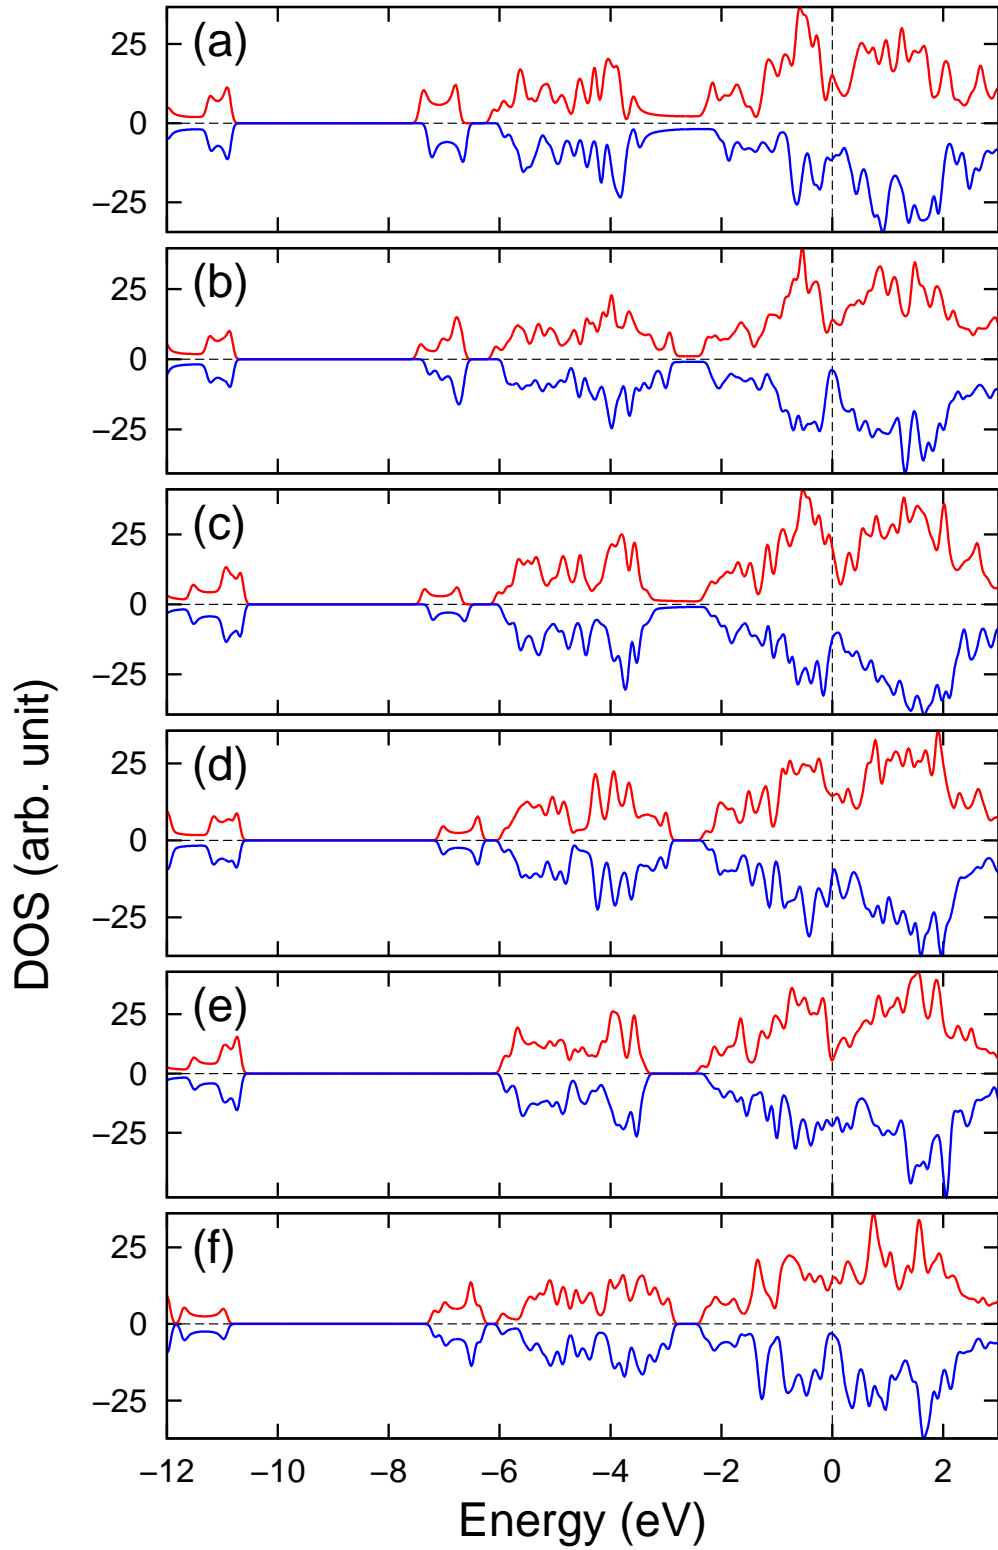

FIG. S9. Total density of states of hydrogen-passivated six types of zigzag  $V_2C$  nanoribbons.

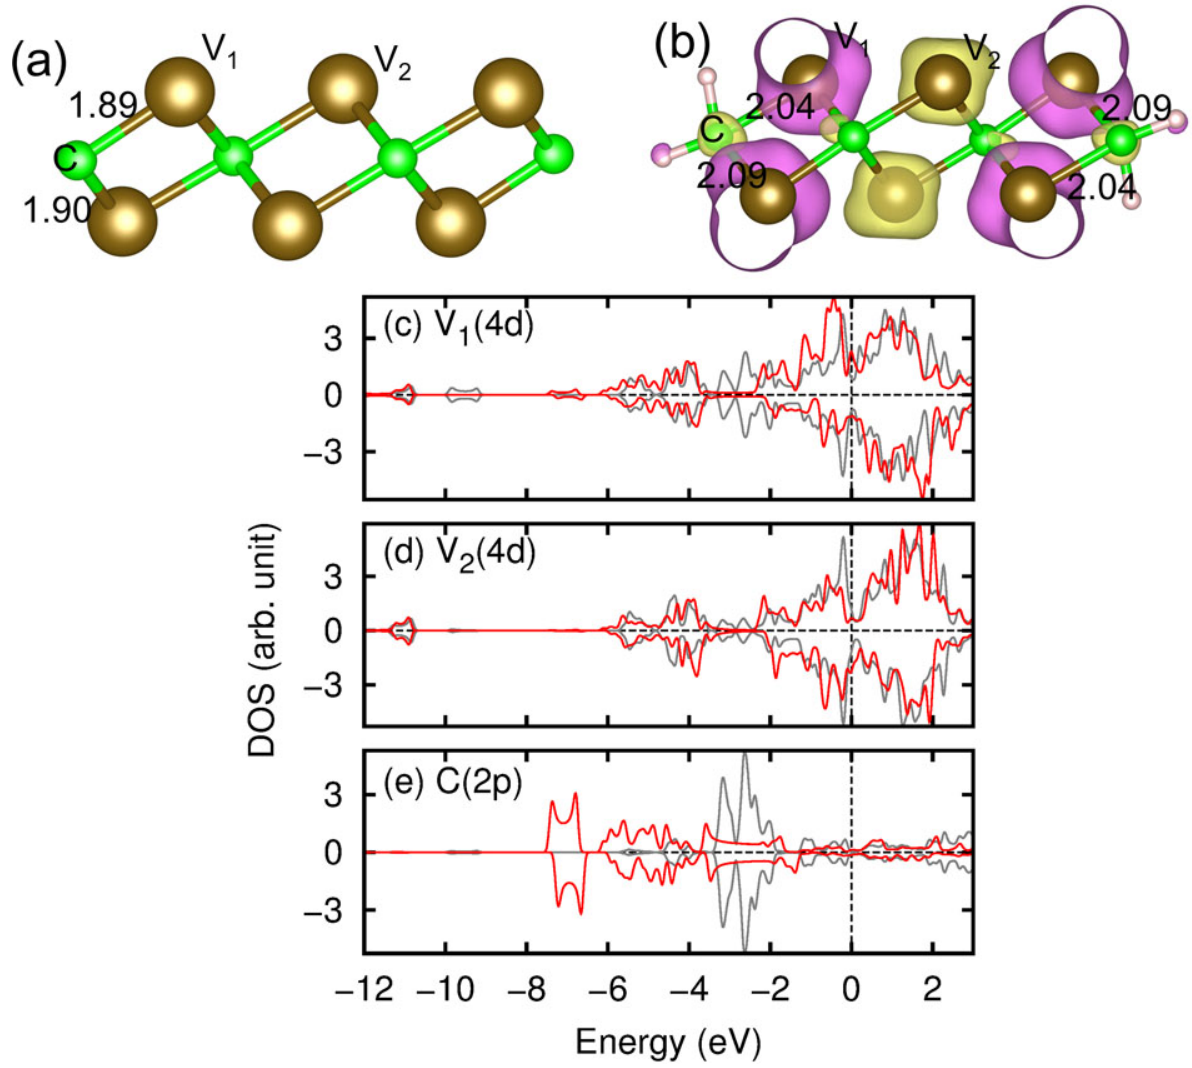

FIG. S10. Spin density plots of bare and hydrogen-passivated 6-CVV-VVC nanoribbons. The isovalue is  $\pm 0.005 \text{ e}^-/\text{au}^3$  with positive represented by purple and negative by gold color. Some bonding distances are denoted in angstrom. The PDOS of selected atoms are provided below and the gray and red curves represent the PDOS of atoms in bare and hydrogen-passivated nanoribbons, respectively.
